# Supplementary material for: Clinical Study of the Relationship between Sjögren Syndrome and T-Cell Large Granular Lymphocytic Leukemia: Single-Center Experience
Source: MDPI journal article supplement (doi:10.3390/ijms232113345), 2022-11-01
Supplement: s1 [file s1]

**Table S1.** *STAT3* mutations in the cohort of 45 patients with T-LGL leukemia and rheumatic disease but without Sjögren syndrome

| Patient no. / Sex | Diagnosis | Samples for <i>STAT3</i> testing | Variants of <i>STAT3</i> mutation |
|-------------------|-----------|----------------------------------|-----------------------------------|
| 1. / F            | RA        | PB                               | –                                 |
| 2. / F            | RA        | PB                               | Y640F; S614R                      |
| 3. / F            | RA        | PB                               | S614R                             |
| 4. / F            | RA        | PB                               | S614R                             |
| 5. / M            | RA        | PB                               | Y640F                             |
| 6. / F            | RA        | PB<br>BM                         | Y640F<br>Y640F                    |
| 7. / F            | RA        | PB                               | N647I                             |
| 8. / M            | RA        | PB                               | Y657_K658insY                     |
| 9. / M            | RA        | PB                               | N647I                             |
| 10. / F           | RA        | PB                               | S614R                             |
| 11. / M           | RA        | PB<br>BM                         | Y657_K658insY<br>Y657_K658insY    |
| 12. / M           | RA        | PB                               | S614R; G618R                      |
| 13. / F           | RA        | PB                               | –                                 |
| 14. / M           | RA        | PB                               | –                                 |
| 15. / F           | RA        | PB                               | –                                 |
| 16. / F           | RA        | PB<br>BM                         | –<br>Y640F                        |
| 17. / F           | RA        | PB                               | –                                 |
| 18. / M           | RA        | PB                               | –                                 |
| 19. / F           | RA        | PB<br>BM                         | –<br>–                            |
| 20. / M           | RA        | PB<br>BM                         | N647I<br>N647I                    |
| 21. / F           | RA        | PB                               | Y640F                             |
| 22. / F           | RA        | PB<br>BM                         | –<br>–                            |
| 23. / F           | RA        | PB                               | –                                 |
| 24. / F /         | RA        | PB<br>BM                         | –<br>–                            |
| 25. / M           | RA        | PB                               | D661Y                             |
| 26. / F           | RA        | PB                               | –                                 |
| 27. / M           | RA        | PB<br>BM                         | Y640F; D661Y<br>Y640F; D661Y      |
| 28. / F           | RA        | PB<br>BM                         | Y640F<br>Y640F                    |
| 29. / F           | RA        | PB                               | –                                 |
| 30. / F           | RA        | PB                               | –                                 |
| 31. / F           | RA        | Spleen                           | –                                 |
| 32. / M           | RA        | PB<br>BM<br>Spleen               | –<br>Y640F<br>Y640F               |
| 33. / M           | RA        | Spleen                           | S614R; N647I; Y640F               |
| 34. / F           | RA        | PB<br>BM<br>Spleen               | –<br>S614R<br>S614R               |

|         |                                   |              |                     |
|---------|-----------------------------------|--------------|---------------------|
| 35. / F | RA                                | PB<br>Spleen | D661Y<br>D661Y      |
| 36. / F | RA                                | PB           | –                   |
| 37. / M | RA                                | PB           | Y640F; D661V; S614R |
| 38. / F | RA                                | PB           | G618R               |
| 39. / F | SLE                               | PB           | Y640F               |
| 40. / F | SLE                               | PB           | K658R               |
| 41. / F | Ankylosing spondylitis            | PB           | D661Y               |
| 42. / M | IIM                               | PB           | –                   |
| 43. / F | IIM                               | PB           | –                   |
| 44. / F | IIM                               | PB           | –                   |
| 45. / F | Primary antiphospholipid syndrome | PB           | D661Y               |

RA, rheumatoid arthritis; SLE, systemic lupus erythematosus; IIM, idiopathic inflammatory myopathy; *STAT3*, signal transducer and activator of transcription 3 gene; BM, bone marrow; PB, peripheral blood; –, negative/absent
